# Supplementary material for: Head Injury as Risk Factor for Psychiatric Disorders: A Nationwide Register-Based Follow-Up Study of 113,906 Persons With Head Injury
Source: Atypon-hosted journal article supplement (doi:10.1176/appi.ajp.2013.13020190), 2013-12-10
Supplement: 463_ds001.pdf [file 463_ds001.pdf]

## Diagnosis Codes of Exposures and Outcomes Based on ICD Codes

| Exposure Diagnoses                                                            | ICD-8 (through 1993)                                                                                                                                                                                               | ICD-10 (1995–2010)                                                                                                                                                                                                                                                                                                                     |
|-------------------------------------------------------------------------------|--------------------------------------------------------------------------------------------------------------------------------------------------------------------------------------------------------------------|----------------------------------------------------------------------------------------------------------------------------------------------------------------------------------------------------------------------------------------------------------------------------------------------------------------------------------------|
| Mild head injury                                                              | 850.99                                                                                                                                                                                                             | S06.0                                                                                                                                                                                                                                                                                                                                  |
| Skull fracture                                                                | 800, 801, 803                                                                                                                                                                                                      | S02.0, S02.1, S02.7, S02.9                                                                                                                                                                                                                                                                                                             |
| Severe head injury                                                            | 851-854                                                                                                                                                                                                            | S06.1-S06.9                                                                                                                                                                                                                                                                                                                            |
| Fractures not involving the skull or spine                                    | 807-829                                                                                                                                                                                                            | S12.8A-S12.8D, S22.2-S22.5, S22.8, S22.9, S32.3-S32.5, S42.0-S42.7, S52.0-S52.9, S62.0-S62.8, S72.0-S72.4, S72.7-S72.9, S82.0-S82.9, S92.0-S92.5, S92.7, S92.9, T10, T12                                                                                                                                                               |
| Infections                                                                    | 000-136, 320-324, 392, 460–486, 612, 620, 622, 590, 59500–9501, 630, 635, 670, 680–686, 710, 02701, 03609, 04000–04399, 47400, 05201, 05302, 05403, 05501, 05601, 07199, 07202, 07501, 07929, 09049, 0949          | A00-B99, DA022C, DA066, DA17, DA229C, DA321, DA390, DA504, DA514B, DA521A–B, DA548A,D, DA80–DA89, DB003–DB004, DB010–DB011, DB020–DB021, DB050–DB051, DB060, DB261–DB262, DB375, DB451, DB582, DB602, DE236A, DG0, DI02, DP352A, J00–J18, K35, L00–L08, M00, N300, N518B, N70–N72, N76, 0,N770D, N771B, N771L, 023, 0264, 085–086, 098 |
| AIDS/HIV                                                                      | 07983                                                                                                                                                                                                              | B20–24                                                                                                                                                                                                                                                                                                                                 |
| Autoimmune diseases                                                           | 242.00, 245.03, 249, 255.1, 269.00, 281.0, 283.90-91, 340, 354, 364, 446.29-446.49, 563.01, 563.19, 571.90, 571.93, 694.00-09, 696.09-19, 704.00, 709.01, 712.09-19, 712.39-59, 716, 733.09, 734.0, 734.19, 734.90 | D51.0, D59.1, D69.3, E05.0, E06.3, E10, E27.1, G35, G61.0, G70.0, H20, K50, K51, K73, K74.3, K90.0, L10, L12, L40.0-3, L40.5-9, L63, L80.9, M05-M06, M08, M31.3, M31.5-6, M32.1, M32.9, M33, M34, M35.0, M35.3, M45.9                                                                                                                  |
| Epilepsy                                                                      | 345                                                                                                                                                                                                                | G40, G41                                                                                                                                                                                                                                                                                                                               |
| Family history of psychiatric and substance abuse disorders                   | 290-294.38, 294.49-309                                                                                                                                                                                             | F00-F99                                                                                                                                                                                                                                                                                                                                |
| <b>Outcome diagnoses</b>                                                      |                                                                                                                                                                                                                    |                                                                                                                                                                                                                                                                                                                                        |
| Schizophrenia spectrum disorders                                              | 295, 297, 298.39                                                                                                                                                                                                   | F20-F29                                                                                                                                                                                                                                                                                                                                |
| Unipolar depression                                                           | 296.09, 296.29, 298.09, 300.49                                                                                                                                                                                     | F32, F33                                                                                                                                                                                                                                                                                                                               |
| Bipolar affective disorder                                                    | 296.19, 296.39                                                                                                                                                                                                     | F30, F31                                                                                                                                                                                                                                                                                                                               |
| Organic mental health disorders (definition with all included diagnoses)      | 293.59                                                                                                                                                                                                             | F06, F07                                                                                                                                                                                                                                                                                                                               |
| Organic mental health disorders (definition restricted to selected diagnoses) | 293.59                                                                                                                                                                                                             | F06.0-F06.3                                                                                                                                                                                                                                                                                                                            |
